# Supplementary material
Source: PubMed Central journal article supplement (PMC2629309)
Supplement: 0808701106_0808701106SI.pdf [file 0808701106_0808701106SI.pdf]

# Supporting Information

Shi et al. 10.1073/pnas.0808701106

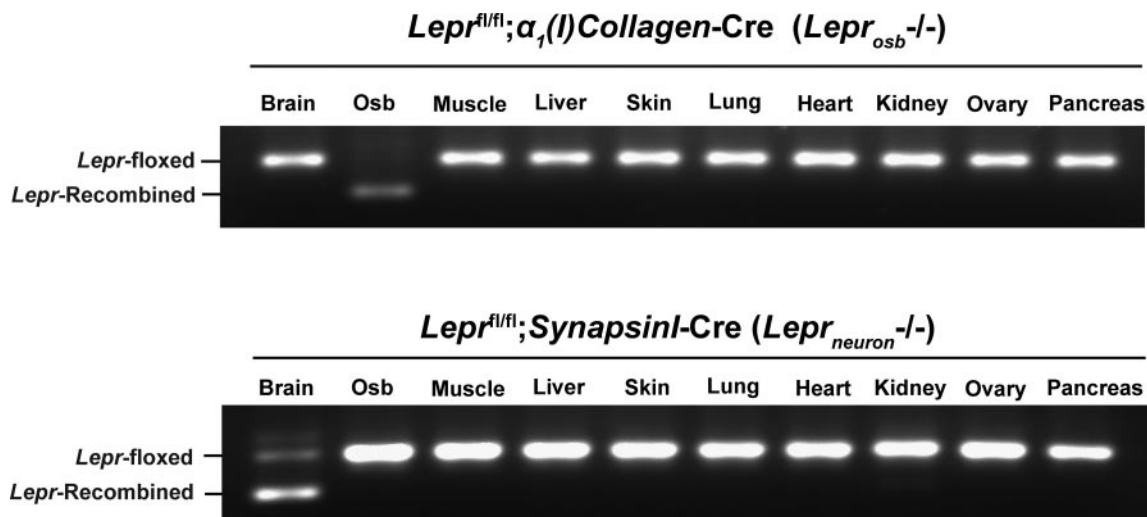

**Fig. S1.** Recombination analysis of the *Lepr* locus in osteoblasts and brain. Representative results of PCR-based genotyping of *Lepr* in various tissues/organs of  $\alpha_1(I)$ Collagen-Cre, *Lepr<sup>fl/fl</sup>*, and *Synapsin1-Cre;Lepr<sup>fl/fl</sup>* mice. The same primers and PCR program have been used as described [McMinn JE, et al. (2004) An allelic series for the leptin receptor gene generated by CRE and FLP recombinase. *Mamm Genome* 15:677–685].

**Table S1. Comparison of the anthropomorphic indices between the *l/l* mice and their WT littermates**

| Indices                                           | WT            | <i>l/l</i>     |
|---------------------------------------------------|---------------|----------------|
| Body weight, g                                    | 20.7 ± 0.4    | 20.1 ± 0.2     |
| Fat pad weight, g                                 | 0.218 ± 0.027 | 0.122 ± 0.015* |
| Urinary epinephrine, ng/mL per mmol creatinine    | 19.0 ± 5.0    | 41.1 ± 16.6    |
| Urinary norepinephrine, ng/mL per mmol creatinine | 26.1 ± 3.3    | 49.1 ± 8.1*    |
| Serum leptin, pg/mL                               | 4.2           | 2.3*           |
| Body temperature, °C                              | 38.3 ± 0.1    | 38.4 ± 0.1     |

Twelve-week-old female mice were used in these analyses,  $n = 8-10$  per group for the analysis of body weight and gonadal fat mass;  $n = 5$  for urinary epinephrine and norepinephrine content; and  $n = 3$  for body temperature measurement.

\* $P < 0.05$ , mean ± SEM. Serum leptin level data have been derived from Bjørnholm M, *et al.* (2007) Mice lacking inhibitory leptin receptor signals are lean with normal endocrine function. *J Clin Invest* 117:1354–1360.
